# Supplementary material for: The Development and Evaluation of Insect Traps for the Asian Citrus Psyllid, Diaphorina citri (Hemiptera: Psyllidae), Vector of Citrus Huanglongbing
Source: MDPI journal article supplement (doi:10.3390/insects13030295), 2022-03-16
Supplement: s1 [file s1]

| Table S1. Field trials in Florida: comparison of different types of traps.                         |                     |                     |                              |                      |                                            |
|----------------------------------------------------------------------------------------------------|---------------------|---------------------|------------------------------|----------------------|--------------------------------------------|
| Location                                                                                           | Trap1               | Trap2               | <i>P</i> -value <sup>a</sup> | Lower 95% Confidence | Upper 95% Confidence Interval <sup>b</sup> |
| Merritt Island                                                                                     | Sticky card         | Cylinder trap ver 1 | <0.001*                      | 1.2898               | 1.5637 <sup>#</sup>                        |
|                                                                                                    | Sticky card         | Cylinder trap ver 2 | <0.001*                      | 1.3669               | 1.6330 <sup>#</sup>                        |
|                                                                                                    | Sticky card         | Stem trap           | <0.001*                      | 5.5966               | 7.9041                                     |
|                                                                                                    | Cylinder trap ver 1 | Cylinder trap ver 2 | 0.274                        | 0.9548               | 1.1804                                     |
|                                                                                                    | Cylinder trap ver 1 | Stem trap           | <0.001*                      | 3.9219               | 5.5923                                     |
|                                                                                                    | Cylinder trap ver 2 | Stem trap           | <0.001*                      | 3.6906               | 5.2728                                     |
| Ocklawaha                                                                                          | Sticky card         | Cylinder trap ver 1 | <0.001*                      | 1.1854               | 1.4891 <sup>#</sup>                        |
|                                                                                                    | Sticky card         | Cylinder trap ver 2 | <0.001*                      | 1.4235               | 1.8123 <sup>#</sup>                        |
|                                                                                                    | Sticky card         | Stem trap           | <0.001*                      | 5.6331               | 8.6287                                     |
|                                                                                                    | Cylinder trap ver 1 | Cylinder trap ver 2 | 0.004*                       | 1.0634               | 1.3743 <sup>#</sup>                        |
|                                                                                                    | Cylinder trap ver 1 | Stem trap           | <0.001*                      | 4.2208               | 6.5236                                     |
|                                                                                                    | Cylinder trap ver 2 | Stem trap           | <0.001*                      | 3.4786               | 5.4166                                     |
| <sup>a</sup> <i>P</i> -values with a [*] sign suggest trap means that are significantly different. |                     |                     |                              |                      |                                            |
| <sup>b</sup> Confidence intervals with a [#] sign suggest similar trap means.                      |                     |                     |                              |                      |                                            |

Table S2. Comparison of traps in Pomona field cage experiment.

| Trial | <i>F</i> -Statistic | ANOVA <i>P</i> -value | Traps compared                   | Tukey's HSD <i>P</i> -value |
|-------|---------------------|-----------------------|----------------------------------|-----------------------------|
| 1     | 4.53                | 0.0161                | Cylindrical traps 1 and 2        | 0.9687                      |
|       |                     |                       | Cylindrical trap 1 and stem trap | 0.0247                      |
|       |                     |                       | Cylindrical trap 2 and stem trap | 0.0441                      |
| 2     | 17.07               | <0.001                | Cylindrical traps 1 and 2        | 0.2526                      |
|       |                     |                       | Cylindrical trap 1 and stem trap | <0.001                      |
|       |                     |                       | Cylindrical trap 2 and stem trap | <0.001                      |
| 3     | 32.92               | <0.001                | Cylindrical traps 1 and 2        | 0.6111                      |
|       |                     |                       | Cylindrical trap 1 and stem trap | <0.001                      |
|       |                     |                       | Cylindrical trap 2 and stem trap | <0.001                      |
| 4     | 65.47               | <0.001                | Cylindrical traps 1 and 2        | 0.9188                      |
|       |                     |                       | Cylindrical trap 1 and stem trap | <0.001                      |
|       |                     |                       | Cylindrical trap 2 and stem trap | <0.001                      |
| 5     | 49.64               | <0.001                | Cylindrical traps 1 and 2        | 0.9842                      |
|       |                     |                       | Cylindrical trap 1 and stem trap | <0.001                      |
|       |                     |                       | Cylindrical trap 2 and stem trap | <0.001                      |
| 6     | 59.79               | <0.001                | Cylindrical traps 1 and 2        | 0.7508                      |
|       |                     |                       | Cylindrical trap 1 and stem trap | <0.001                      |
|       |                     |                       | Cylindrical trap 2 and stem trap | <0.001                      |

The ANOVA and Tukey's HSD *P*-values compare the means computed for the ACP captured in traps tested at Pomona, CA. Each of the six trials had three trap designs (n=16) and were conducted from May 2018 through April 2019. Each trial was conducted for 28 days inside field cages.

Table S3. Identified Hemiptera (excluding *Diaphorina citri* Kuwayama) collected in early prototype Stem traps in Riverside and Santa Paula, 2016–2017. The table is organized in sections based on Suborder and Infraorder to keep taxonomic groups together.

| Superfamily/Family                  | Genus                 | species             | Author                 |
|-------------------------------------|-----------------------|---------------------|------------------------|
| <b>Auchenorrhyncha/Cicadomorpha</b> |                       |                     |                        |
| Membracoidea/Cicadellidae           | <i>Ceratagallia</i>   | sp.                 |                        |
| Membracoidea/Cicadellidae           | <i>Chlorotettix</i>   | sp.                 |                        |
| Membracoidea/Cicadellidae           | <i>Empoasca</i>       | sp.                 |                        |
| Membracoidea/Cicadellidae           | <i>Graminella</i>     | sp.                 |                        |
| Membracoidea/Cicadellidae           | <i>Homalodisca</i>    | <i>vitripennis</i>  | Germar                 |
| Membracoidea/Cicadellidae           | <i>Osbornellus</i>    | <i>scalaris</i>     | (Van Duzee)            |
| Membracoidea/Cicadellidae           | <i>Scaphytopus</i>    | sp.                 |                        |
| Membracoidea/Cicadellidae           | <i>Sophonia</i>       | <i>orientalis</i>   | (Matsumura)            |
| <b>Auchenorrhyncha/Fulgoroidea</b>  |                       |                     |                        |
| Fulgoroidea/Cixiidae                | <i>Melanoliarus</i>   | sp.                 |                        |
| <b>Heteroptera/Cimicomorpha</b>     |                       |                     |                        |
| Cimicoidea/Anthocoridae             | <i>Orius</i>          | sp.                 |                        |
| Cimicoidea/Anthocoridae             | <i>Orius</i>          | <i>tricolor</i>     | (White)                |
| Miroidea/Miridae                    | <i>Lygus</i>          | <i>elusus</i>       | Van Duzee              |
| Miroidea/Miridae                    | <i>Rhinacloa</i>      | <i>forticornis</i>  | Reuter                 |
| Miroidea/Thaumastocoridae           | <i>Thaumastocoris</i> | <i>peregrinus</i>   | Carpintero and Dellapé |
| Miroidea/Tingidae                   | <i>Corythucha</i>     | sp.                 |                        |
| <b>Heteroptera/Pentatomomorpha</b>  |                       |                     |                        |
| Coreoidea/Rhopalidae                | <i>Liorhyssus</i>     | <i>hyalinus</i>     | (Fabricius)            |
| Lygaeoidea/Geocoridae               | <i>Geocoris</i>       | sp.                 |                        |
| Lygaeoidea/Lygaeidae                | <i>Nysius</i>         | <i>raphanus</i>     | Howard                 |
| Lygaeoidea/Lygaeidae                | <i>Nysius</i>         | <i>tenellus</i>     | Barber                 |
| Lygaeoidea/Lygaeidae                | <i>Xyonysius</i>      | sp.                 |                        |
| Lygaeoidea/Ninidae                  | <i>Cymoninus</i>      | sp.                 |                        |
| Pentatomoidea/Pentatomidae          | <i>Holcostethus</i>   | <i>approximatus</i> | Parshley               |
| <b>Sternorrhyncha</b>               |                       |                     |                        |
| Aphidoidea/Aphididae                | <i>Acyrtosiphon</i>   | <i>lactucae</i>     | (Passerini)            |
| Aphidoidea/Aphididae                | <i>Aphis</i>          | <i>coreopsidis</i>  | (Thomas)               |
| Aphidoidea/Aphididae                | <i>Aphis</i>          | <i>craccivora</i>   | Koch                   |
| Aphidoidea/Aphididae                | <i>Aphis</i>          | <i>eugeniae</i> (?) | van der Goot           |
| Aphidoidea/Aphididae                | <i>Aphis</i>          | <i>fabae</i>        | Scopoli                |
| Aphidoidea/Aphididae                | <i>Aphis</i>          | <i>gossypii</i>     | Glover                 |
| Aphidoidea/Aphididae                | <i>Aphis</i>          | <i>spiraecola</i>   | Patch                  |
| Aphidoidea/Aphididae                | <i>Aphis</i>          | sp.                 |                        |

|                        |                      |                        |                     |
|------------------------|----------------------|------------------------|---------------------|
| Aphidoidea/Aphididae   | <i>Brevicoryne</i>   | <i>brassicae</i>       | (Linnaeus)          |
| Aphidoidea/Aphididae   | <i>Diuraphis</i>     | <i>noxia</i>           | (Mordvilko)         |
| Aphidoidea/Aphididae   | <i>Dysaphis</i>      | sp.                    |                     |
| Aphidoidea/Aphididae   | <i>Eulachnus</i>     | sp.                    |                     |
| Aphidoidea/Aphididae   | <i>Greenidea</i>     | <i>ficicola</i>        | Takahashi           |
| Aphidoidea/Aphididae   | <i>Greenidea</i>     | <i>psidii</i>          | van der Goot        |
| Aphidoidea/Aphididae   | <i>Hyperomyzus</i>   | <i>carduellinus</i>    | (Theobald)          |
| Aphidoidea/Aphididae   | <i>Lipaphis</i>      | <i>pseudobrassicae</i> | (Davis)             |
| Aphidoidea/Aphididae   | <i>Myzus</i>         | <i>persicae</i>        | (Sulzer)            |
| Aphidoidea/Aphididae   | <i>Nearctaphis</i>   | sp.                    |                     |
| Aphidoidea/Aphididae   | <i>Rhopalosiphum</i> | <i>maidis</i>          | (Fitch)             |
| Aphidoidea/Aphididae   | <i>Rhopalosiphum</i> | <i>padi</i>            | (Linnaeus)          |
| Aphidoidea/Aphididae   | <i>Rhopalosiphum</i> | <i>rufiabdominale</i>  | (Sasaki)            |
| Aphidoidea/Aphididae   | <i>Sarucallis</i>    | <i>kahawaluokalani</i> | (Kirkaldy)          |
| Aphidoidea/Aphididae   | <i>Shivaphis</i>     | <i>celti</i>           | Das                 |
| Aphidoidea/Aphididae   | <i>Tetraneura</i>    | sp.                    |                     |
| Psylloidea/Aphalaridae | <i>Ctenarytaina</i>  | <i>spatulata</i>       | Taylor              |
| Psylloidea/Aphalaridae | <i>Glycaspis</i>     | <i>brimblecombei</i>   | Moore               |
| Psylloidea/Calophyidae | <i>Calophya</i>      | <i>schini</i>          | Tuthill             |
| Psylloidea/Calophyidae | <i>Calophya</i>      | sp.                    |                     |
| Psylloidea/Psyllidae   | <i>Acizzia</i>       | <i>uncatoides</i>      | (Ferris and Klyver) |
| Psylloidea/Psyllidae   | <i>Acizzia</i>       | sp.                    |                     |
| Psylloidea/Trioziidae  | <i>Bactericera</i>   | <i>maculipennis</i>    | (Crawford)          |
| Psylloidea             | unknown              |                        |                     |

Table S4. Identified Hemiptera (excluding *Diaphorina citri* Kuwayama) collected in cylinder traps deployed in Temecula, CA, 2019–2020. The table is organized in sections based on Suborder and Infraorder to keep taxonomic groups together.

| Superfamily/Family                  | Genus                | species                | author      |
|-------------------------------------|----------------------|------------------------|-------------|
| <b>Auchenorrhyncha/Cicadomorpha</b> |                      |                        |             |
| Cercopoidea/Clastopteridae          | <i>Clastoptera</i>   | sp.                    |             |
| Membracoidea/Cicadellidae           | <i>Agalliopsis</i>   | <i>variabilis</i>      | Oman        |
| Membracoidea/Cicadellidae           | <i>Alconeura</i>     | sp.                    |             |
| Membracoidea/Cicadellidae           | <i>Baldulus</i>      | sp.                    |             |
| Membracoidea/Cicadellidae           | <i>Aceratagallia</i> | <i>californica</i>     | (Baker)     |
| Membracoidea/Cicadellidae           | <i>Aceratagallia</i> | <i>longula</i>         | (Van Duzee) |
| Membracoidea/Cicadellidae           | <i>Empoasca</i>      | sp.                    |             |
| Membracoidea/Cicadellidae           | <i>Graminella</i>    | sp.                    |             |
| Membracoidea/Cicadellidae           | <i>Graphocephala</i> | sp.                    |             |
| Membracoidea/Cicadellidae           | <i>Homalodisca</i>   | <i>vitripennis</i>     | Germar      |
| Membracoidea/Cicadellidae           | <i>Macrosteles</i>   | sp.                    |             |
| Membracoidea/Cicadellidae           | <i>Osbornellus</i>   | sp.                    |             |
| Membracoidea/Cicadellidae           | <i>Scaphytopius</i>  | sp.                    |             |
| Membracoidea/Cicadellidae           | <i>Sophonia</i>      | <i>orientalis</i>      | (Matsumura) |
| <b>Auchenorrhyncha/Fulgomorpha</b>  |                      |                        |             |
| Fulgoroidea/Delphacidae             | <i>Peregrinus</i>    | <i>maidis</i>          | (Ashmead)   |
| <b>Heteroptera/Cimicomorpha</b>     |                      |                        |             |
| Miroidea/Miridae                    | <i>Rhinacloa</i>     | <i>forticornis</i>     | Reuter      |
| Miroidea/Tingidae                   | <i>Corythucha</i>    | sp.                    |             |
| <b>Heteroptera/Pentatomomorpha</b>  |                      |                        |             |
| Lygaeoidea/Geocoridae               | <i>Geocoris</i>      | sp.                    |             |
| Lygaeoidea/Lygaeidae                | <i>Nysius</i>        | <i>raphanus</i>        | Howard      |
| <b>Sternorrhyncha</b>               |                      |                        |             |
| Aphidoidea/Aphididae                | <i>Aphis</i>         | <i>gossypii</i>        | Glover      |
| Aphidoidea/Aphididae                | <i>Protaphis</i>     | <i>middletonii</i>     | (Thomas)    |
| Aphidoidea/Aphididae                | <i>Aphis</i>         | <i>spiraecola</i>      | Patch       |
| Aphidoidea/Aphididae                | <i>Aphis</i>         | sp.                    |             |
| Aphidoidea/Aphididae                | <i>Brachycaudus</i>  | sp.                    |             |
| Aphidoidea/Aphididae                | <i>Hyalopterus</i>   | <i>pruni</i>           | (Geoffroy)  |
| Aphidoidea/Aphididae                | <i>Hysteroneura</i>  | <i>setariae</i>        | (Thomas)    |
| Aphidoidea/Aphididae                | <i>Lipaphis</i>      | <i>pseudobrassicae</i> | (Davis)     |
| Aphidoidea/Aphididae                | <i>Myzus</i>         | <i>persicae</i>        | (Sulzer)    |
| Aphidoidea/Aphididae                | <i>Rhopalosiphum</i> | <i>maidis</i>          | (Fitch)     |
| Aphidoidea/Aphididae                | <i>Sarucallis</i>    | <i>kahawaluokalani</i> | (Kirkaldy)  |
| Aphidoidea/Aphididae                | <i>Sipha</i>         | <i>maydis</i>          | Passerini   |
| Aphidoidea/Aphididae                | <i>Uroleucon</i>     | sp.                    |             |
| Psylloidea/Aphalaridae              | <i>Blastopsylla</i>  | <i>occidentalis</i>    | Taylor      |
| Psylloidea/Aphalaridae              | <i>Glycaspis</i>     | <i>brimblecombei</i>   | Moore       |
| Psylloidea/Psyllidae                | <i>Acizzia</i>       | sp.                    |             |

|                       |                    |                   |        |
|-----------------------|--------------------|-------------------|--------|
| Psylloidea/Psyllidae  | <i>Cacopsylla</i>  | sp.               |        |
| Psylloidea/Trioziidae | <i>Bactericera</i> | <i>cockerelli</i> | (Šulc) |
| Psylloidea/Trioziidae | <i>Trioza</i>      | sp.               |        |
